# Supplementary material for: Population genomics confirms acquisition of drug-resistant Aspergillus fumigatus infection by humans from the environment
Source: PubMed Central journal article supplement (PMC9064804; doi:10.1038/s41564-022-01091-2), 2022-04-25
Supplement: 41564_2022_1091_MOESM1_ESM.pdf [file 41564_2022_1091_MOESM1_ESM.pdf]

---

**Supplementary information**

---

**Population genomics confirms acquisition of drug-resistant *Aspergillus fumigatus* infection by humans from the environment**

---

In the format provided by the authors and unedited

## Supplementary Information

### Supplementary Tables

**Table S1**

Clinical and environmental isolates of *A. fumigatus* used in this study, and details of whole-genome alignments. Patient cohort details for clinical isolates is provided, when available. Location information provided, where available. More accurate latitude and longitude details provided in the Microreact project. CF = cystic fibrosis; COPD = chronic obstructive pulmonary disease; RLL = right lower lobe; ABPA = allergic bronchopulmonary aspergillosis.

| Isolate | Source        | Location                 | <i>Cyp51A</i> polymorphisms | No. of reads aligned (millions) | Depth of coverage (x) | % reference genome covered |
|---------|---------------|--------------------------|-----------------------------|---------------------------------|-----------------------|----------------------------|
| ARAF001 | Clinical (CF) | Leeds, England           | TR <sub>34</sub> /L98H      | 51.9                            | 174                   | 94.4                       |
| ARAF002 | Clinical (CF) | Leeds, England           | TR <sub>34</sub> /L98H      | 48.3                            | 162                   | 95.0                       |
| ARAF003 | Clinical (CF) | Leeds, England           | Wildtype                    | 43.6                            | 147                   | 95.2                       |
| ARAF004 | Clinical (CF) | Leeds, England           | Wildtype                    | 43.7                            | 146                   | 93.1                       |
| ARAF005 | Clinical (CF) | Leeds, England           | Wildtype                    | 47.4                            | 159                   | 95.4                       |
| ARAF006 | Clinical (CF) | Leeds, England           | Wildtype                    | 50.1                            | 169                   | 93.2                       |
| C1      | Environmental | Cardiff, Wales           | TR <sub>34</sub> /L98H      | 6.1                             | 31                    | 91.1                       |
| C2      | Environmental | Cardiff, Wales           | TR <sub>34</sub> /L98H      | 7.2                             | 36                    | 89.6                       |
| C3      | Environmental | Cardiff, Wales           | TR <sub>34</sub> /L98H      | 6.5                             | 33                    | 91.1                       |
| C4      | Environmental | Cardiff, Wales           | Wildtype                    | 7.5                             | 37                    | 91.9                       |
| C5      | Environmental | Vale of Glamorgan, Wales | TR <sub>34</sub> /L98H      | 6.7                             | 33                    | 91.1                       |
| C6      | Environmental | Vale of Glamorgan, Wales | TR <sub>34</sub> /L98H      | 7.3                             | 37                    | 89.2                       |
| C7      | Environmental | Vale of Glamorgan, Wales | TR <sub>34</sub> /L98H      | 6.4                             | 32                    | 88.6                       |
| C8      | Environmental | Vale of Glamorgan, Wales | TR <sub>34</sub> /L98H      | 6.8                             | 34                    | 91.2                       |
| C10     | Environmental | Cardemere, Wales         | TR <sub>34</sub> /L98H      | 7.0                             | 35                    | 88.9                       |
| C11     | Environmental | Cardemere, Wales         | TR <sub>34</sub> /L98H      | 7.4                             | 37                    | 89.1                       |
| C12     | Environmental | Cardemere, Wales         | TR <sub>34</sub> /L98H      | 6.0                             | 34                    | 91.1                       |

|     |               |                          |                        |     |    |      |
|-----|---------------|--------------------------|------------------------|-----|----|------|
| C13 | Environmental | Vale of Glamorgan, Wales | TR <sub>34</sub> /L98H | 7.1 | 36 | 90.9 |
| C14 | Environmental | Vale of Glamorgan, Wales | TR <sub>34</sub> /L98H | 7.6 | 38 | 90.8 |
| C15 | Environmental | Vale of Glamorgan, Wales | TR <sub>34</sub> /L98H | 7.4 | 37 | 90.7 |
| C16 | Environmental | Vale of Glamorgan, Wales | TR <sub>34</sub> /L98H | 6.8 | 34 | 90.8 |
| C17 | Environmental | Vale of Glamorgan, Wales | TR <sub>34</sub> /L98H | 7.5 | 37 | 91.2 |
| C18 | Environmental | Vale of Glamorgan, Wales | TR <sub>34</sub> /L98H | 6.4 | 32 | 90.6 |
| C19 | Environmental | Vale of Glamorgan, Wales | TR <sub>34</sub> /L98H | 6.5 | 32 | 89.0 |
| C20 | Environmental | Vale of Glamorgan, Wales | TR <sub>34</sub> /L98H | 7.0 | 35 | 91.1 |
| C21 | Environmental | Pembrokeshire, Wales     | TR <sub>34</sub> /L98H | 6.9 | 34 | 91.1 |
| C22 | Environmental | Newport, Wales           | TR <sub>34</sub> /L98H | 7.4 | 37 | 91.1 |
| C23 | Environmental | Newport, Wales           | TR <sub>34</sub> /L98H | 7.4 | 37 | 91.2 |
| C24 | Environmental | Newport, Wales           | TR <sub>34</sub> /L98H | 6.1 | 31 | 90.5 |
| C25 | Environmental | Cardiff, Wales           | TR <sub>34</sub> /L98H | 7.0 | 35 | 87.7 |
| C26 | Environmental | Cardiff, Wales           | G54R                   | 5.3 | 26 | 87.9 |
| C27 | Environmental | Cardiff, Wales           | TR <sub>34</sub> /L98H | 6.2 | 31 | 88.3 |
| C28 | Environmental | Cardiff, Wales           | TR <sub>34</sub> /L98H | 5.8 | 29 | 90.7 |
| C29 | Environmental | Cardiff, Wales           | TR <sub>34</sub> /L98H | 5.8 | 29 | 90.9 |
| C30 | Environmental | Cardiff, Wales           | TR <sub>34</sub> /L98H | 5.9 | 29 | 90.7 |
| C31 | Environmental | Monmouthshire, Wales     | TR <sub>34</sub> /L98H | 6.4 | 32 | 90.8 |
| C32 | Clinical (CF) | Cardiff, Wales           | TR <sub>34</sub> /L98H | 6.6 | 33 | 91.1 |
| C33 | Clinical (CF) | Cardiff, Wales           | TR <sub>34</sub> /L98H | 6.1 | 30 | 91.1 |
| C34 | Clinical (CF) | Cardiff, Wales           | Wildtype               | 6.5 | 32 | 90.9 |
| C35 | Clinical (CF) | Cardiff, Wales           | Wildtype               | 6.6 | 33 | 88.8 |
| C36 | Clinical (CF) | Cardiff, Wales           | Wildtype               | 6.6 | 33 | 88.9 |
| C37 | Clinical (CF) | Cardiff, Wales           | Wildtype               | 7.1 | 36 | 90.7 |

|     |               |                         |          |     |    |      |
|-----|---------------|-------------------------|----------|-----|----|------|
| C38 | Clinical (CF) | Cardiff, Wales          | Wildtype | 7.1 | 35 | 89.3 |
| C39 | Clinical (CF) | Cardiff, Wales          | Wildtype | 6.9 | 35 | 88.6 |
| C40 | Clinical (CF) | Dublin, Rep. of Ireland | Wildtype | 7.3 | 37 | 89.3 |
| C41 | Clinical (CF) | Dublin, Rep. of Ireland | Wildtype | 7.7 | 39 | 89.4 |
| C42 | Clinical (CF) | Dublin, Rep. of Ireland | Wildtype | 6.7 | 33 | 91.8 |
| C43 | Clinical (CF) | Dublin, Rep. of Ireland | Wildtype | 6.6 | 33 | 91.8 |
| C44 | Clinical (CF) | Dublin, Rep. of Ireland | Wildtype | 6.1 | 31 | 91.7 |
| C45 | Clinical (CF) | Dublin, Rep. of Ireland | Wildtype | 6.0 | 30 | 93.4 |
| C46 | Clinical (CF) | Dublin, Rep. of Ireland | Wildtype | 6.5 | 33 | 91.2 |
| C47 | Clinical (CF) | Dublin, Rep. of Ireland | Wildtype | 7.1 | 35 | 92.2 |
| C48 | Clinical (CF) | Dublin, of Ireland      | Wildtype | 7.1 | 36 | 91.8 |
| C49 | Clinical (CF) | Dublin, Rep. of Ireland | Wildtype | 7.6 | 38 | 88.9 |
| C50 | Clinical (CF) | Dublin, Rep. of Ireland | Wildtype | 8.4 | 42 | 88.8 |
| C51 | Clinical (CF) | Dublin, Rep. of Ireland | Wildtype | 0.5 | 37 | 93.3 |
| C52 | Clinical (CF) | Dublin, Rep. of Ireland | Wildtype | 7.5 | 37 | 89.9 |
| C53 | Clinical (CF) | Dublin, Rep. of Ireland | Wildtype | 7.0 | 35 | 91.3 |
| C54 | Clinical (CF) | Dublin, Rep. of Ireland | Wildtype | 6.6 | 33 | 92.4 |
| C55 | Clinical (CF) | Dublin, Rep. of Ireland | Wildtype | 8.0 | 40 | 91.6 |
| C56 | Clinical (CF) | Dublin, Rep. of Ireland | Wildtype | 7.3 | 36 | 91.3 |
| C57 | Clinical (CF) | Dublin, Rep. of Ireland | Wildtype | 7.6 | 38 | 91.4 |
| C58 | Clinical (CF) | Dublin, Rep. of Ireland | Wildtype | 6.1 | 31 | 90.6 |
| C59 | Clinical (CF) | Dublin, Rep. of Ireland | Wildtype | 7.3 | 37 | 90.1 |
| C60 | Clinical (CF) | Dublin, Rep. of Ireland | Wildtype | 6.5 | 33 | 90.1 |
| C61 | Clinical (CF) | Dublin, Rep. of Ireland | Wildtype | 6.9 | 35 | 90.4 |
| C62 | Clinical (CF) | Dublin, Rep. of Ireland | Wildtype | 7.0 | 35 | 90.1 |

|     |               |                         |                                |     |    |      |
|-----|---------------|-------------------------|--------------------------------|-----|----|------|
| C63 | Clinical (CF) | Dublin, Rep. of Ireland | Wildtype                       | 7.1 | 35 | 90.1 |
| C64 | Clinical (CF) | Dublin, Rep. of Ireland | Wildtype                       | 7.1 | 35 | 89.8 |
| C65 | Clinical (CF) | Dublin, Rep. of Ireland | Wildtype                       | 7.4 | 37 | 89.6 |
| C66 | Clinical (CF) | Dublin, Rep. of Ireland | Wildtype                       | 6.6 | 33 | 89.5 |
| C67 | Clinical      | Dublin, Rep. of Ireland | Wildtype                       | 6.2 | 31 | 91.1 |
| C68 | Clinical (CF) | Dublin, Rep. of Ireland | TR <sub>34</sub> /L98H         | 6.3 | 32 | 91.1 |
| C69 | Clinical      | Dublin, Rep. of Ireland | TR <sub>34</sub> /L98H         | 6.9 | 35 | 91.2 |
| C70 | Clinical      | Dublin, Rep. of Ireland | TR <sub>34</sub> /L98H         | 6.4 | 32 | 91.2 |
| C71 | Clinical      | Dublin, Rep. of Ireland | Wildtype                       | 6.5 | 32 | 90.0 |
| C72 | Clinical      | Dublin, Rep. of Ireland | Wildtype                       | 7.4 | 37 | 90.0 |
| C73 | Clinical      | Dublin, Rep. of Ireland | Wildtype                       | 7.3 | 37 | 90.4 |
| C74 | Clinical      | Dublin, Rep. of Ireland | Wildtype                       | 7.7 | 38 | 89.3 |
| C75 | Clinical      | Dublin, Rep. of Ireland | Wildtype                       | 8.5 | 42 | 89.7 |
| C76 | Clinical      | Dublin, Rep. of Ireland | Wildtype                       | 7.4 | 37 | 88.9 |
| C77 | Clinical      | Dublin, Rep. of Ireland | Wildtype                       | 7.5 | 37 | 89.0 |
| C78 | Environmental | Dublin, Rep. of Ireland | TR <sub>34</sub> /L98H         | 8.1 | 40 | 89.1 |
| C79 | Environmental | Dublin, Rep. of Ireland | TR <sub>46</sub> /T289A/Y121 F | 8.1 | 40 | 91.9 |
| C80 | Environmental | Dublin, Rep. of Ireland | TR <sub>34</sub> /L98H         | 7.8 | 39 | 89.5 |
| C81 | Clinical      | Dublin, Rep. of Ireland | Wildtype                       | 8.7 | 43 | 91.7 |
| C82 | Clinical      | Dublin, Rep. of Ireland | TR <sub>34</sub> /L98H         | 6.6 | 33 | 88.2 |
| C83 | Clinical      | Dublin, Rep. of Ireland | TR <sub>34</sub> /L98H         | 8.2 | 41 | 91.3 |
| C84 | Clinical      | Dublin, Rep. of Ireland | TR <sub>34</sub> /L98H         | 6.8 | 34 | 91.2 |
| C85 | Environmental | Dublin, Rep. of Ireland | TR <sub>34</sub> /L98H         | 7.1 | 35 | 90.9 |
| C86 | Environmental | Dublin, Rep. of Ireland | TR <sub>34</sub> /L98H         | 7.2 | 36 | 92.0 |
| C87 | Environmental | Dublin, Rep. of Ireland | TR <sub>46</sub> /T289A/Y121 F | 8.0 | 40 | 90.1 |

|      |                           |                         |                                |     |    |      |
|------|---------------------------|-------------------------|--------------------------------|-----|----|------|
| C88  | Environmental             | Dublin, Rep. of Ireland | TR <sub>34</sub> /L98H         | 7.4 | 37 | 93.3 |
| C89  | Environmental             | Dublin, Rep. of Ireland | TR <sub>46</sub> /T289A/Y121 F | 7.2 | 36 | 90.4 |
| C91  | Environmental             | Dublin, Rep. of Ireland | TR <sub>46</sub> /T289A/Y121 F | 6.8 | 34 | 90.1 |
| C92  | Environmental             | Dublin, Rep. of Ireland | TR <sub>34</sub> /L98H         | 7.3 | 37 | 90.8 |
| C93  | Environmental             | Dublin, Rep. of Ireland | TR <sub>46</sub> /T289A/Y121 F | 6.6 | 33 | 90.7 |
| C95  | Environmental             | Dublin, Rep. of Ireland | Wildtype                       | 7.3 | 36 | 89.7 |
| C96  | Environmental             | Dublin, Rep. of Ireland | Wildtype                       | 7.6 | 38 | 91.9 |
| C99  | Clinical                  | Scotland                | TR <sub>34</sub> /L98H         | 5.8 | 28 | 96.0 |
| C100 | Clinical (CF)             | England                 | TR <sub>34</sub> /L98H         | 6.3 | 31 | 96.2 |
| C103 | Clinical                  | England                 | TR <sub>34</sub> /L98H         | 5.8 | 28 | 96.5 |
| C104 | Clinical                  | Scotland                | TR <sub>34</sub> /L98H         | 5.7 | 28 | 95.9 |
| C105 | Clinical                  | Scotland                | TR <sub>34</sub> /L98H         | 5.6 | 27 | 95.6 |
| C106 | Clinical                  | England                 | TR <sub>34</sub> /L98H         | 6.0 | 29 | 96.5 |
| C107 | Clinical                  | England                 | TR <sub>34</sub> /L98H         | 6.5 | 32 | 95.7 |
| C108 | Clinical                  | England                 | TR <sub>34</sub> /L98H         | 6.8 | 33 | 96.6 |
| C109 | Clinical                  | England                 | TR <sub>34</sub> /L98H         | 6.1 | 29 | 96.5 |
| C110 | Clinical (CF)             | England                 | TR <sub>34</sub> /L98H         | 6.3 | 31 | 95.7 |
| C111 | Clinical (COPD)           | England                 | TR <sub>34</sub> /L98H         | 6.6 | 32 | 96.6 |
| C112 | Clinical (CF)             | England                 | TR <sub>34</sub> /L98H         | 6.5 | 32 | 96.2 |
| C113 | Clinical                  | England                 | Wildtype                       | 6.2 | 30 | 96.1 |
| C114 | Clinical (Bronchiectasis) | Scotland                | TR <sub>34</sub> /L98H         | 6.6 | 32 | 96.0 |
| C115 | Clinical (Liver failure)  | England                 | TR <sub>34</sub> /L98H         | 6.5 | 30 | 96.5 |
| C117 | Clinical                  | England                 | Wildtype                       | 6.2 | 30 | 94.6 |
| C118 | Clinical                  | England                 | Wildtype                       | 6.6 | 31 | 95.1 |

|      |                                     |                 |                        |     |    |      |
|------|-------------------------------------|-----------------|------------------------|-----|----|------|
| C119 | Clinical (respiratory illness/TB)   | England         | TR <sub>34</sub> /L98H | 6.2 | 30 | 95.6 |
| C120 | Clinical (Lung lesion)              | England         | G54R                   | 6.4 | 31 | 96.6 |
| C121 | Clinical                            | England         | G54E                   | 6.1 | 31 | 94.9 |
| C122 | Clinical (RLL cavity)               | England         | TR <sub>34</sub> /L98H | 6.3 | 31 | 95.7 |
| C123 | Clinical                            | England         | Wildtype               | 6.2 | 29 | 96.2 |
| C124 | Clinical                            | London, England | G54W                   | 6.3 | 29 | 96.8 |
| C125 | Clinical (CF)                       | London, England | Wildtype               | 6.3 | 27 | 96.2 |
| C126 | Clinical (Aortic valve replacement) | London, England | G54W                   | 6.5 | 28 | 96.8 |
| C127 | Clinical (CF)                       | London, England | Wildtype               | 6.0 | 29 | 96.6 |
| C128 | Clinical (CF)                       | London, England | Wildtype               | 5.5 | 27 | 97.1 |
| C129 | Clinical (CF)                       | London, England | Wildtype               | 5.6 | 27 | 96.1 |
| C130 | Clinical (CF)                       | London, England | G54W                   | 5.8 | 28 | 96.4 |
| C131 | Clinical (CF)                       | London, England | G54W                   | 6.0 | 29 | 96.4 |
| C132 | Clinical (CF)                       | London, England | G54W                   | 6.5 | 32 | 96.4 |
| C133 | Clinical                            | London, England | TR <sub>34</sub> /L98H | 5.9 | 29 | 96.2 |
| C134 | Clinical (CF)                       | London, England | TR <sub>34</sub> /L98H | 6.1 | 30 | 96.7 |
| C135 | Clinical (CF)                       | London, England | G54W                   | 6.4 | 31 | 96.4 |
| C136 | Clinical (CF)                       | London, England | Wildtype               | 5.8 | 28 | 97.0 |
| C137 | Clinical (CF)                       | London, England | Wildtype               | 5.9 | 29 | 97.1 |
| C138 | Clinical (ABPA)                     | London, England | P216L                  | 6.3 | 31 | 96.4 |
| C139 | Clinical (CF)                       | London, England | Wildtype               | 6.3 | 31 | 96.2 |
| C140 | Clinical (Bronchiectasis)           | London, England | G54W                   | 6.5 | 32 | 96.8 |
| C141 | Clinical (CF)                       | London, England | TR <sub>34</sub> /L98H | 6.4 | 31 | 96.8 |

|      |                                      |                 |                                           |     |    |      |
|------|--------------------------------------|-----------------|-------------------------------------------|-----|----|------|
| C142 | Clinical (Bronchiectasis)            | London,         | G54W                                      | 6.5 | 31 | 99.6 |
| C143 | Clinical (CF)                        | London, England | TR <sub>34</sub> /L98H                    | 6.4 | 31 | 96.2 |
| C144 | Clinical (CF)                        | London,         | TR <sub>34</sub> /L98H                    | 6.3 | 30 | 95.8 |
| C145 | Clinical (CF)                        | London, England | P216L                                     | 6.2 | 30 | 96.9 |
| C146 | Clinical (CF)                        | Leeds, England  | Wildtype                                  | 6.9 | 34 | 96.9 |
| C147 | Clinical (CF)                        | Leeds, England  | Wildtype                                  | 7.2 | 35 | 96.9 |
| C148 | Clinical (CF)                        | Leeds, England  | Wildtype                                  | 7.3 | 35 | 96.7 |
| C149 | Clinical (CF)                        | Leeds, England  | TR <sub>34</sub> /L98H                    | 6.9 | 34 | 96.7 |
| C150 | Clinical (CF)                        | Leeds, England  | TR <sub>34</sub> /L98H                    | 7.2 | 35 | 96.7 |
| C151 | Clinical (CF)                        | Leeds,          | TR <sub>34</sub> /L98H                    | 6.8 | 33 | 96.7 |
| C152 | Clinical (CF)                        | Leeds, England  | Wildtype                                  | 7.0 | 34 | 96.9 |
| C153 | Clinical (CF)                        | Leeds, England  | Wildtype                                  | 6.9 | 34 | 96.9 |
| C154 | Clinical (CF)                        | Leeds, England  | Wildtype                                  | 7.0 | 34 | 96.9 |
| C155 | Clinical                             | London, England | TR <sub>34</sub> /L98H/T289A /I364V/G448S | 7.0 | 34 | 95.4 |
| C156 | Clinical                             | London, England | TR <sub>34</sub> /L98H/T289A /I364V/G448S | 6.4 | 31 | 95.4 |
| C157 | Clinical                             | London, England | TR <sub>34</sub> /L98H/T289A /I364V/G448S | 6.3 | 31 | 95.4 |
| C158 | Clinical                             | London, England | TR <sub>34</sub> /L98H/T289A /I364V/G448S | 6.2 | 31 | 95.4 |
| C159 | Clinical (Asthma and bronchiectasis) | London, England | TR <sub>34</sub> /L98H                    | 6.3 | 31 | 95.7 |
| C160 | Clinical (Asthma and bronchiectasis) | London, England | TR <sub>34</sub> /L98H                    | 6.3 | 31 | 95.7 |
| C161 | Clinical (trauma)                    | London, England | TR <sub>34</sub> /L98H                    | 6.3 | 31 | 96.5 |
| C162 | Clinical                             | London, England | Wildtype                                  | 6.6 | 32 | 94.9 |
| C163 | Clinical                             | London, England | G54W                                      | 6.6 | 32 | 95.0 |
| C164 | Clinical (CF)                        | London, England | Wildtype                                  | 6.4 | 31 | 96.6 |



|      |               |                 |                        |     |    |      |
|------|---------------|-----------------|------------------------|-----|----|------|
| C165 | Clinical (CF) | London, England | Wildtype               | 6.4 | 32 | 95.4 |
| C166 | Clinical (CF) | London, England | Wildtype               | 6.6 | 32 | 96.2 |
| C167 | Clinical (CF) | London, England | Wildtype               | 6.5 | 32 | 96.5 |
| C168 | Clinical (CF) | London, England | Wildtype               | 6.5 | 32 | 96.0 |
| C169 | Clinical (CF) | London, England | Wildtype               | 6.4 | 31 | 96.2 |
| C170 | Clinical (CF) | London, England | Wildtype               | 6.4 | 32 | 96.3 |
| C171 | Clinical (CF) | London, England | TR <sub>34</sub> /L98H | 7.3 | 36 | 96.9 |
| C172 | Clinical (CF) | London, England | Wildtype               | 7.4 | 34 | 96.0 |
| C173 | Clinical (CF) | London, England | Wildtype               | 7.3 | 36 | 95.1 |
| C174 | Clinical (CF) | London, England | Wildtype               | 7.7 | 38 | 95.1 |
| C175 | Clinical (CF) | London, England | Wildtype               | 7.1 | 35 | 97.0 |
| C176 | Clinical (CF) | London, England | Wildtype               | 7.0 | 34 | 97.0 |
| C177 | Clinical (CF) | London, England | Wildtype               | 7.6 | 37 | 94.9 |
| C178 | Clinical (CF) | London, England | Wildtype               | 7.2 | 35 | 97.9 |
| C179 | Clinical (CF) | London, England | Wildtype               | 7.5 | 37 | 95.9 |
| C180 | Clinical (CF) | London, England | Wildtype               | 5.8 | 28 | 97.0 |
| C181 | Clinical (CF) | London, England | Wildtype               | 6.6 | 32 | 96.1 |
| C182 | Clinical (CF) | London, England | Wildtype               | 7.2 | 35 | 96.2 |
| C183 | Clinical (CF) | London, England | Wildtype               | 6.8 | 33 | 96.3 |
| C184 | Clinical (CF) | London, England | Wildtype               | 6.9 | 33 | 96.9 |
| C185 | Clinical (CF) | London, England | Wildtype               | 6.8 | 33 | 96.9 |
| C186 | Clinical (CF) | London, England | Wildtype               | 7.0 | 34 | 96.6 |
| C187 | Clinical (CF) | London, England | Wildtype               | 6.7 | 33 | 96.2 |
| C188 | Clinical (CF) | London, England | Wildtype               | 7.1 | 35 | 94.8 |
| C189 | Clinical (CF) | London, England | G54R                   | 6.6 | 32 | 96.9 |

|      |               |                         |                                |      |    |      |
|------|---------------|-------------------------|--------------------------------|------|----|------|
| C190 | Clinical (CF) | London, England         | Wildtype                       | 6.5  | 32 | 96.5 |
| C191 | Clinical (CF) | London, England         | Wildtype                       | 6.8  | 33 | 97.2 |
| C220 | Environmental | Dublin, Rep. of Ireland | Wildtype                       | 6.6  | 30 | 95.1 |
| C221 | Environmental | Dublin, Rep. of Ireland | Wildtype                       | 7.0  | 31 | 94.7 |
| C222 | Environmental | Dublin, Rep. of Ireland | Wildtype                       | 10.3 | 37 | 95.2 |
| C223 | Environmental | Dublin, Rep. of Ireland | Wildtype                       | 7.8  | 35 | 94.9 |
| C246 | Environmental | Nottingham, England     | Wildtype                       | 9.7  | 42 | 94.7 |
| C272 | Environmental | Nottingham, England     | Wildtype                       | 9.4  | 42 | 95.9 |
| C275 | Environmental | Yorkshire, England      | Wildtype                       | 8.1  | 36 | 96.8 |
| C341 | Environmental | Didcot, England         | TR <sub>34</sub> /L98H         | 8.5  | 42 | 96.7 |
| C342 | Environmental | Hyde Park, England      | TR <sub>34</sub> /L98H         | 9.9  | 48 | 95.4 |
| C343 | Environmental | Hyde Park, England      | Wildtype                       | 9.0  | 44 | 96.3 |
| C344 | Environmental | Hyde Park, England      | Wildtype                       | 9.1  | 45 | 96.0 |
| C345 | Environmental | Hyde Park, England      | Wildtype                       | 8.9  | 44 | 96.6 |
| C346 | Environmental | Hyde Park, England      | Wildtype                       | 8.6  | 42 | 96.1 |
| C354 | Clinical      | Dublin, Rep. of Ireland | TR <sub>34</sub> /L98H         | 9.1  | 45 | 96.0 |
| C355 | Clinical      | Dublin, Rep. of Ireland | TR <sub>34</sub> /L98H         | 9.9  | 48 | 96.0 |
| C356 | Clinical      | Dublin, Rep. of Ireland | TR <sub>34</sub> /L98H         | 8.9  | 44 | 96.7 |
| C357 | Environmental | Dublin, Rep. of Ireland | TR <sub>34</sub> /L98H         | 8.9  | 44 | 96.0 |
| C358 | Environmental | Dublin, of Ireland      | TR <sub>46</sub> /T289A/Y121 F | 9.3  | 45 | 96.3 |
| C359 | Clinical      | Dublin, Rep. of Ireland | TR <sub>34</sub> /L98H         | 10.3 | 50 | 97.0 |
| C360 | Environmental | Dublin, Rep. of Ireland | TR <sub>46</sub> /T289A/Y121 F | 8.7  | 42 | 96.2 |
| C361 | Clinical      | Dublin, Rep. of Ireland | Wildtype                       | 9.0  | 44 | 96.4 |
| C362 | Clinical      | Dublin, Rep. of Ireland | Wildtype                       | 8.4  | 41 | 96.4 |
| C363 | Clinical      | Dublin, Rep. of Ireland | Wildtype                       | 9.2  | 45 | 96.5 |

|      |               |                    |                        |      |    |      |
|------|---------------|--------------------|------------------------|------|----|------|
| C364 | Environmental | Aberdeen, Scotland | TR <sub>34</sub> /L98H | 8.8  | 43 | 96.9 |
| C365 | Environmental | Aberdeen, Scotland | TR <sub>34</sub>       | 10.0 | 49 | 96.8 |
| C366 | Environmental | Aberdeen, Scotland | TR <sub>34</sub> /L98H | 10.3 | 49 | 96.3 |
| C367 | Environmental | Aberdeen, Scotland | Wildtype               | 10.2 | 50 | 95.8 |
| C368 | Environmental | Aberdeen, Scotland | TR <sub>34</sub> /L98H | 10.4 | 48 | 96.3 |
| C369 | Environmental | Aberdeen, Scotland | TR <sub>34</sub> /L98H | 9.2  | 45 | 96.3 |

**Table S2**

In vitro antifungal susceptibility profiles of *A. fumigatus* isolates and corresponding resistance markers in *cyp51A*, mating type idiomorph and Clade membership as detected by whole genome sequencing. ND = not determined.

| Isolate | MIC (mg/litre) of <sup>a</sup> : |       |       | Resistance marker      | Mating type | Clade membership |
|---------|----------------------------------|-------|-------|------------------------|-------------|------------------|
|         | ITC                              | VOR   | POS   |                        |             |                  |
| ARAF001 | >16                              | 1     | 0.5   | TR <sub>34</sub> /L98H | MAT1-1      | A                |
| ARAF002 | >16                              | 1     | 0.5   | TR <sub>34</sub> /L98H | MAT1-1      | A                |
| ARAF003 | 1                                | 0.25  | 0.06  | Wildtype               | MAT1-2      | B                |
| ARAF004 | 1                                | 0.5   | 0.25  | Wildtype               | MAT1-1      | A                |
| ARAF005 | 0.5                              | 0.125 | 0.06  | Wildtype               | MAT1-2      | B                |
| ARAF006 | 0.5                              | 0.5   | 0.06  | Wildtype               | MAT1-1      | A                |
| C1      | >16                              | 2     | 0.12  | TR <sub>34</sub> /L98H | MAT1-2      | A                |
| C2      | >16                              | 2     | 0.25  | TR <sub>34</sub> /L98H | MAT1-2      | A                |
| C3      | >16                              | 2     | 0.12  | TR <sub>34</sub> /L98H | MAT1-2      | A                |
| C4      | >16                              | 8     | <0.5  | Wildtype               | MAT1-2      | B                |
| C5      | >16                              | 2     | 0.12  | TR <sub>34</sub> /L98H | MAT1-2      | A                |
| C6      | >16                              | 2     | 0.25  | TR <sub>34</sub> /L98H | MAT1-2      | A                |
| C7      | >16                              | 4     | 0.25  | TR <sub>34</sub> /L98H | MAT1-2      | A                |
| C8      | >16                              | 2     | 0.12  | TR <sub>34</sub> /L98H | MAT1-2      | A                |
| C10     | >16                              | 8     | 0.5   | TR <sub>34</sub> /L98H | MAT1-2      | A                |
| C11     | >16                              | 2     | 0.25  | TR <sub>34</sub> /L98H | MAT1-2      | A                |
| C12     | >16                              | 4     | 0.25  | TR <sub>34</sub> /L98H | MAT1-2      | A                |
| C13     | >16                              | 2     | 0.12  | TR <sub>34</sub> /L98H | MAT1-2      | A                |
| C14     | >16                              | >8    | 0.5   | TR <sub>34</sub> /L98H | MAT1-2      | A                |
| C15     | >16                              | 8     | <0.5  | TR <sub>34</sub> /L98H | MAT1-2      | A                |
| C16     | >16                              | 2     | 0.12  | TR <sub>34</sub> /L98H | MAT1-2      | A                |
| C17     | >16                              | 2     | 0.12  | TR <sub>34</sub> /L98H | MAT1-2      | A                |
| C18     | >16                              | 2     | 0.12  | TR <sub>34</sub> /L98H | MAT1-2      | A                |
| C19     | >16                              | 1     | 0.25  | TR <sub>34</sub> /L98H | MAT1-2      | A                |
| C20     | >16                              | 2     | <0.25 | TR <sub>34</sub> /L98H | MAT1-2      | A                |
| C21     | >16                              | 2     | 0.025 | TR <sub>34</sub> /L98H | MAT1-2      | A                |

|     |        |       |       |                        |        |   |
|-----|--------|-------|-------|------------------------|--------|---|
| C22 | >16    | 2     | 0.12  | TR <sub>34</sub> /L98H | MAT1-2 | A |
| C23 | >16    | 2     | 0.12  | TR <sub>34</sub> /L98H | MAT1-2 | A |
| C24 | >16    | 2     | 0.12  | TR <sub>34</sub> /L98H | MAT1-2 | A |
| C25 | >16    | 4     | 0.25  | TR <sub>34</sub> /L98H | MAT1-2 | A |
| C26 | >16    | 0.25  | 1     | G54R                   | MAT1-2 | A |
| C27 | >16    | 1     | 0.25  | TR <sub>34</sub> /L98H | MAT1-2 | A |
| C28 | >16    | 4     | 0.25  | TR <sub>34</sub> /L98H | MAT1-1 | A |
| C29 | >16    | 4     | 0.5   | TR <sub>34</sub> /L98H | MAT1-2 | A |
| C30 | >16    | 2     | 0.25  | TR <sub>34</sub> /L98H | MAT1-2 | A |
| C31 | >16    | 2     | 0.12  | TR <sub>34</sub> /L98H | MAT1-2 | A |
| C32 | >16    | 0.5   | 0.5   | TR <sub>34</sub> /L98H | MAT1-2 | A |
| C33 | >16    | 1     | 0.5   | TR <sub>34</sub> /L98H | MAT1-2 | A |
| C34 | <0.03  | 0.06  | 0.03  | Wildtype               | MAT1-1 | B |
| C35 | 0.06   | 0.06  | 0.06  | Wildtype               | MAT1-1 | A |
| C36 | 0.06   | 0.25  | 0.06  | Wildtype               | MAT1-1 | A |
| C37 | 0.25   | 0.125 | 0.06  | Wildtype               | MAT1-1 | B |
| C38 | 0.125  | 0.25  | 0.06  | Wildtype               | MAT1-1 | A |
| C39 | 0.06   | 0.25  | 0.06  | Wildtype               | MAT1-2 | B |
| C40 | 0.06   | 0.25  | 0.03  | Wildtype               | MAT1-1 | B |
| C41 | 0.25   | 0.25  | 0.25  | Wildtype               | MAT1-1 | B |
| C42 | 0.25   | 0.25  | 0.12  | Wildtype               | MAT1-2 | B |
| C43 | 0.03   | 0.12  | 0.015 | Wildtype               | MAT1-2 | B |
| C44 | 0.03   | 0.12  | 0.015 | Wildtype               | MAT1-2 | B |
| C45 | 0.03   | 0.12  | 0.015 | Wildtype               | MAT1-2 | B |
| C46 | 0.03   | 0.12  | 0.015 | Wildtype               | MAT1-2 | B |
| C47 | 0.03   | 0.015 | 0.015 | Wildtype               | MAT1-2 | B |
| C48 | 0.03   | 0.015 | 0.015 | Wildtype               | MAT1-2 | B |
| C49 | 0.12   | 0.25  | 0.06  | Wildtype               | MAT1-1 | B |
| C50 | 0.25   | 0.12  | 0.06  | Wildtype               | MAT1-1 | B |
| C51 | 0.06   | 0.25  | 0.03  | Wildtype               | MAT1-2 | B |
| C52 | <0.015 | 0.12  | 0.03  | Wildtype               | MAT1-2 | B |
| C53 | 0.25   | 0.12  | 0.06  | Wildtype               | MAT1-2 | B |
| C54 | 0.06   | 0.25  | 0.03  | Wildtype               | MAT1-2 | B |
| C55 | 0.03   | 0.25  | 0.015 | Wildtype               | MAT1-2 | B |
| C56 | 0.12   | 0.12  | 0.015 | Wildtype               | MAT1-1 | B |
| C57 | 0.06   | 0.06  | 0.03  | Wildtype               | MAT1-1 | B |
| C58 | 0.03   | 0.12  | 0.015 | Wildtype               | MAT1-1 | A |
| C59 | 0.25   | 0.12  | 0.06  | Wildtype               | MAT1-1 | A |
| C60 | 0.12   | 0.12  | 0.03  | Wildtype               | MAT1-1 | A |
| C61 | 0.03   | 0.25  | 0.015 | Wildtype               | MAT1-1 | A |
| C62 | 0.03   | 0.25  | 0.015 | Wildtype               | MAT1-1 | A |
| C63 | 0.03   | 0.12  | 0.015 | Wildtype               | MAT1-1 | A |
| C64 | 0.25   | 0.25  | 0.12  | Wildtype               | MAT1-1 | A |
| C65 | 0.03   | 0.12  | 0.015 | Wildtype               | MAT1-1 | A |
| C66 | 0.03   | 0.12  | 0.015 | Wildtype               | MAT1-1 | A |
| C67 | 0.03   | 0.25  | 0.015 | Wildtype               | MAT1-2 | B |
| C68 | 0.25   | 0.25  | 0.06  | TR <sub>34</sub> /L98H | MAT1-2 | A |
| C69 | 1      | 0.5   | 0.25  | TR <sub>34</sub> /L98H | MAT1-2 | A |
| C70 | 1      | 1     | 0.25  | TR <sub>34</sub> /L98H | MAT1-2 | A |
| C71 | 0.12   | 0.03  | 0.008 | Wildtype               | MAT1-1 | B |

|      |      |       |       |                               |        |   |
|------|------|-------|-------|-------------------------------|--------|---|
| C72  | 0.03 | 0.12  | 0.015 | Wildtype                      | MAT1-1 | B |
| C73  | 0.03 | 0.12  | 0.015 | Wildtype                      | MAT1-2 | B |
| C74  | 0.03 | 0.12  | 0.015 | Wildtype                      | MAT1-2 | B |
| C75  | 0.25 | 0.25  | 0.12  | Wildtype                      | MAT1-1 | A |
| C76  | 0.03 | 0.12  | 0.015 | Wildtype                      | MAT1-2 | B |
| C77  | 0.06 | 0.25  | 0.03  | Wildtype                      | MAT1-2 | B |
| C78  | ND   | ND    | ND    | TR <sub>34</sub> /L98H        | MAT1-1 | A |
| C79  | ND   | ND    | ND    | TR <sub>46</sub> /Y121F/T289A | MAT1-2 | A |
| C80  | ND   | ND    | ND    | TR <sub>34</sub> /L98H        | MAT1-2 | A |
| C81  | 0.25 | 0.25  | 0.06  | Wildtype                      | MAT1-1 | B |
| C82  | 4    | 2     | 1     | TR <sub>34</sub> /L98H        | MAT1-2 | A |
| C83  | 16   | 2     | 0.5   | TR <sub>34</sub> /L98H        | MAT1-2 | A |
| C84  | 4    | 4     | 0.5   | TR <sub>34</sub> /L98H        | MAT1-2 | A |
| C85  | ND   | ND    | ND    | TR <sub>34</sub> /L98H        | MAT1-2 | A |
| C86  | ND   | ND    | ND    | TR <sub>34</sub> /L98H        | MAT1-1 | A |
| C87  | ND   | ND    | ND    | TR <sub>46</sub> /Y121F/T289A | MAT1-1 | B |
| C88  | ND   | ND    | ND    | TR <sub>34</sub> /L98H        | MAT1-2 | A |
| C89  | ND   | ND    | ND    | TR <sub>46</sub> /Y121F/T289A | MAT1-2 | A |
| C91  | ND   | ND    | ND    | TR <sub>46</sub> /Y121F/T289A | MAT1-1 | B |
| C92  | ND   | ND    | ND    | TR <sub>34</sub> /L98H        | MAT1-2 | A |
| C93  | ND   | ND    | ND    | TR <sub>46</sub> /Y121F/T289A | MAT1-2 | A |
| C95  | ND   | ND    | ND    | Wildtype                      | MAT1-1 | B |
| C96  | ND   | ND    | ND    | Wildtype                      | MAT1-2 | B |
| C99  | 2    | 2     | 0.5   | TR <sub>34</sub> /L98H        | MAT1-1 | A |
| C100 | 16   | 4     | ND    | TR <sub>34</sub> /L98H        | MAT1-2 | A |
| C103 | 1    | 2     | ND    | TR <sub>34</sub> /L98H        | MAT1-2 | A |
| C104 | >16  | 0.5   | 1     | TR <sub>34</sub> /L98H        | MAT1-1 | A |
| C105 | >16  | 4     | ND    | TR <sub>34</sub> /L98H        | MAT1-2 | A |
| C106 | 2    | 4     | ND    | TR <sub>34</sub> /L98H        | MAT1-2 | A |
| C107 | 1    | 4     | ND    | TR <sub>34</sub> /L98H        | MAT1-2 | A |
| C108 | 16   | 1     | ND    | TR <sub>34</sub> /L98H        | MAT1-2 | A |
| C109 | >16  | 1     | ND    | TR <sub>34</sub> /L98H        | MAT1-1 | B |
| C110 | >16  | 1     | ND    | TR <sub>34</sub> /L98H        | MAT1-2 | A |
| C111 | 16   | 2     | ND    | TR <sub>34</sub> /L98H        | MAT1-1 | A |
| C112 | 16   | 2     | ND    | TR <sub>34</sub> /L98H        | MAT1-2 | A |
| C113 | ND   | 0.25  | ND    | Wildtype                      | MAT1-1 | B |
| C114 | >16  | 2     | ND    | TR <sub>34</sub> /L98H        | MAT1-1 | A |
| C115 | 4    | 1     | 0.25  | TR <sub>34</sub> /L98H        | MAT1-1 | A |
| C117 | 1    | 2     | ND    | Wildtype                      | MAT1-2 | B |
| C118 | 8    | 1     | ND    | Wildtype                      | MAT1-2 | B |
| C119 | 16   | 1     | ND    | TR <sub>34</sub> /L98H        | MAT1-2 | A |
| C120 | >16  | 0.125 | ND    | G54R                          | MAT1-1 | B |
| C121 | >16  | 0.25  | 0.5   | G54E                          | MAT1-1 | A |
| C122 | >16  | 2     | ND    | TR <sub>34</sub> /L98H        | MAT1-2 | A |
| C123 | >16  | 2     | 0.25  | TR <sub>34</sub> /L98H        | MAT1-2 | A |
| C124 | >16  | 0.125 | 4     | G54W                          | MAT1-1 | B |
| C125 | >16  | 2     | 2     | TR <sub>34</sub> /L98H        | MAT1-2 | A |
| C126 | >16  | 0.03  | 2     | G54W                          | MAT1-1 | B |
| C127 | >16  | 0.25  | 0.125 | Wildtype                      | MAT1-2 | B |
| C128 | >16  | 2     | 1     | Wildtype                      | MAT1-2 | B |

|      |      |       |       |                                          |        |   |
|------|------|-------|-------|------------------------------------------|--------|---|
| C129 | 8    | 2     | 0.5   | Wildtype                                 | MAT1-2 | B |
| C130 | >16  | 0.125 | 8     | G54W                                     | MAT1-2 | B |
| C131 | >16  | 0.125 | 16    | G54W                                     | MAT1-2 | B |
| C132 | >16  | 0.125 | 8     | G54W                                     | MAT1-2 | B |
| C133 | >16  | 2     | 2     | TR <sub>34</sub> /L98H                   | MAT1-2 | A |
| C134 | 16   | 2     | 1     | TR <sub>34</sub> /L98H                   | MAT1-1 | B |
| C135 | >16  | 0.125 | 16    | G54W                                     | MAT1-2 | B |
| C136 | >16  | 2     | 2     | Wildtype                                 | MAT1-2 | B |
| C137 | >16  | 2     | 2     | Wildtype                                 | MAT1-2 | B |
| C138 | >16  | 0.25  | 2     | P216L                                    | MAT1-1 | B |
| C139 | >16  | 2     | 1     | Wildtype                                 | MAT1-2 | B |
| C140 | >16  | 0.125 | 16    | G54W                                     | MAT1-1 | B |
| C141 | 16   | 1     | 0.25  | TR <sub>34</sub> /L98H                   | MAT1-1 | B |
| C142 | >16  | 0.06  | 0.25  | G54W                                     | MAT1-1 | A |
| C143 | 16   | 2     | 0.5   | TR <sub>34</sub> /L98H                   | MAT1-2 | A |
| C144 | >16  | 2     | 0.25  | TR <sub>34</sub> /L98H                   | MAT1-2 | A |
| C145 | >16  | 0.125 | 0.5   | P216L                                    | MAT1-2 | B |
| C146 | 0.5  | 0.125 | 0.03  | Wildtype                                 | MAT1-2 | B |
| C147 | 1    | 0.125 | 0.03  | Wildtype                                 | MAT1-2 | B |
| C148 | 2    | 0.125 | 0.03  | Wildtype                                 | MAT1-2 | B |
| C149 | >16  | 0.25  | 0.125 | TR <sub>34</sub> /L98H                   | MAT1-1 | A |
| C150 | 16   | 0.25  | 0.125 | TR <sub>34</sub> /L98H                   | MAT1-1 | A |
| C151 | >16  | 0.25  | 0.125 | TR <sub>34</sub> /L98H                   | MAT1-1 | A |
| C152 | 0.5  | 0.125 | 0.03  | Wildtype                                 | MAT1-2 | B |
| C153 | 1    | 0.125 | 0.03  | Wildtype                                 | MAT1-2 | B |
| C154 | 1    | 0.125 | 0.03  | Wildtype                                 | MAT1-2 | B |
| C155 | 16   | >16   | 4     | TR <sub>34</sub> /L98H/T289A/I364V/G448S | MAT1-2 | A |
| C156 | 16   | >16   | 4     | TR <sub>34</sub> /L98H/T289A/I364V/G448S | MAT1-2 | A |
| C157 | 16   | >16   | 4     | TR <sub>34</sub> /L98H/T289A/I364V/G448S | MAT1-2 | A |
| C158 | 16   | >16   | 4     | TR <sub>34</sub> /L98H/T289A/I364V/G448S | MAT1-2 | A |
| C159 | >16  | 2     | 0.5   | TR <sub>34</sub> /L98H                   | MAT1-2 | A |
| C160 | >16  | 2     | 0.5   | TR <sub>34</sub> /L98H                   | MAT1-2 | A |
| C161 | 4    | 0.5   | 0.125 | TR <sub>34</sub> /L98H                   | MAT1-1 | A |
| C162 | 2    | 2     | 1     | Wildtype                                 | MAT1-1 | A |
| C163 | >16  | 1     | >16   | G54W                                     | MAT1-1 | A |
| C164 | 2    | 1     | 0.125 | Wildtype                                 | MAT1-2 | B |
| C165 | 2    | 0.5   | 0.125 | Wildtype                                 | MAT1-1 | B |
| C166 | 1    | 0.25  | 0.06  | Wildtype                                 | MAT1-2 | B |
| C167 | 0.06 | 0.06  | 0.03  | Wildtype                                 | MAT1-1 | B |
| C168 | 2    | 0.25  | 0.03  | Wildtype                                 | MAT1-1 | B |
| C169 | 0.06 | 0.06  | 0.015 | Wildtype                                 | MAT1-2 | B |
| C170 | 0.06 | 0.06  | 0.015 | Wildtype                                 | MAT1-2 | B |
| C171 | 16   | 0.5   | 0.25  | TR <sub>34</sub> /L98H                   | MAT1-2 | A |
| C172 | 0.06 | 0.06  | 0.03  | Wildtype                                 | MAT1-2 | B |
| C173 | 0.06 | 0.06  | 0.015 | Wildtype                                 | MAT1-1 | B |
| C174 | 0.06 | 0.06  | 0.03  | Wildtype                                 | MAT1-1 | B |
| C175 | 0.06 | 0.06  | 0.03  | Wildtype                                 | MAT1-2 | B |
| C176 | 0.06 | 0.06  | 0.03  | Wildtype                                 | MAT1-1 | B |
| C177 | 0.06 | 0.125 | 0.03  | Wildtype                                 | MAT1-1 | A |
| C178 | 0.06 | 0.06  | 0.03  | Wildtype                                 | MAT1-2 | B |

|      |       |       |       |                               |        |   |
|------|-------|-------|-------|-------------------------------|--------|---|
| C179 | 0.06  | 0.06  | 0.03  | Wildtype                      | MAT1-1 | B |
| C180 | 0.06  | 0.06  | 0.03  | Wildtype                      | MAT1-2 | B |
| C181 | 0.06  | 0.125 | 0.06  | Wildtype                      | MAT1-1 | B |
| C182 | 0.125 | 0.125 | 0.03  | Wildtype                      | MAT1-2 | B |
| C183 | 0.125 | 0.06  | 0.03  | Wildtype                      | MAT1-2 | B |
| C184 | 0.06  | 0.06  | 0.03  | Wildtype                      | MAT1-2 | B |
| C185 | 0.06  | 0.06  | 0.03  | Wildtype                      | MAT1-1 | B |
| C186 | 0.06  | 0.06  | 0.03  | Wildtype                      | MAT1-1 | A |
| C187 | 0.06  | 0.06  | 0.03  | Wildtype                      | MAT1-2 | B |
| C188 | 0.125 | 0.06  | 0.03  | Wildtype                      | MAT1-1 | A |
| C189 | >16   | 0.06  | 0.25  | G54R                          | MAT1-2 | B |
| C190 | 0.06  | 0.03  | 0.03  | Wildtype                      | MAT1-1 | B |
| C191 | 0.06  | 0.06  | 0.015 | Wildtype                      | MAT1-2 | B |
| C220 | 0.06  | 0.06  | 0.06  | Wildtype                      | MAT1-1 | A |
| C221 | 0.125 | 0.06  | 0.06  | Wildtype                      | MAT1-2 | A |
| C222 | 0.06  | 0.06  | 0.03  | Wildtype                      | MAT1-2 | B |
| C223 | 0.125 | 0.06  | 0.06  | Wildtype                      | MAT1-1 | A |
| C246 | 0.125 | 0.125 | 0.06  | Wildtype                      | MAT1-2 | A |
| C272 | 0.125 | 0.125 | 0.03  | Wildtype                      | MAT1-2 | B |
| C275 | 0.125 | 0.125 | 0.06  | Wildtype                      | MAT1-2 | B |
| C341 | >16   | 0.5   | 0.25  | TR <sub>34</sub> /L98H        | MAT1-1 | A |
| C342 | >16   | 0.5   | 0.25  | TR <sub>34</sub> /L98H        | MAT1-2 | A |
| C343 | 0.06  | 0.06  | 0.03  | Wildtype                      | MAT1-2 | B |
| C344 | 0.125 | 0.06  | 0.03  | Wildtype                      | MAT1-1 | B |
| C345 | 0.25  | 0.06  | 0.03  | Wildtype                      | MAT1-2 | B |
| C356 | 0.25  | 0.06  | 0.03  | Wildtype                      | MAT1-2 | B |
| C354 | 4     | 2     | 0.5   | TR <sub>34</sub> /L98H        | MAT1-2 | A |
| C355 | 2     | 2     | 0.5   | TR <sub>34</sub> /L98H        | MAT1-1 | A |
| C356 | 0.5   | 2     | 0.5   | TR <sub>34</sub> /L98H        | MAT1-2 | A |
| C357 | ND    | ND    | ND    | TR <sub>34</sub> /L98H        | MAT1-1 | A |
| C358 | ND    | ND    | ND    | TR <sub>46</sub> /Y121F/T289A | MAT1-2 | A |
| C359 | 32    | 2     | 0.5   | TR <sub>34</sub> /L98H        | MAT1-2 | A |
| C360 | ND    | ND    | ND    | TR <sub>46</sub> /Y121F/T289A | MAT1-2 | A |
| C361 | ND    | ND    | ND    | Wildtype                      | MAT1-2 | A |
| C362 | 0.75  | 0.125 | 0.25  | Wildtype                      | MAT1-2 | A |
| C363 | 0.03  | 0.12  | 0.25  | Wildtype                      | MAT1-2 | A |
| C364 | 4     | 0.5   | ND    | TR <sub>34</sub> /L98H        | MAT1-1 | A |
| C365 | 16    | 2     | ND    | TR <sub>34</sub>              | MAT1-1 | A |
| C366 | 4     | 0.25  | ND    | TR <sub>34</sub> /L98H        | MAT1-1 | A |
| C367 | 1     | 0.5   | ND    | Wildtype                      | MAT1-2 | A |
| C368 | 4     | 0.5   | ND    | TR <sub>34</sub> /L98H        | MAT1-2 | A |
| C369 | 1     | 0.5   | ND    | TR <sub>34</sub> /L98H        | MAT1-1 | A |

**Table S3**

*A. fumigatus* isolates presented in this study with raised MICs to antifungal azole drugs, yet with no known resistance polymorphism within *cyp51A*. ND = not done.

| Isolate | ITC MIC (mg/litre) | VOR MIC (mg/litre) | POS MIC (mg/litre) |
|---------|--------------------|--------------------|--------------------|
| C117    | 1                  | 2                  | ND                 |

|      |     |       |       |
|------|-----|-------|-------|
| C118 | 8   | 1     | ND    |
| C127 | >16 | 0.25  | 0.125 |
| C128 | >16 | 2     | 1     |
| C129 | 8   | 2     | 0.5   |
| C136 | >16 | 2     | 2     |
| C137 | >16 | 2     | 2     |
| C139 | >16 | 2     | 1     |
| C148 | 2   | 0.125 | 0.03  |
| C162 | 2   | 2     | 1     |
| C164 | 2   | 1     | 0.125 |
| C165 | 2   | 0.5   | 0.125 |
| C168 | 2   | 0.25  | 0.03  |

**Table S4**

Relative frequencies of *cyp51A* genotypes and mating-type idiomorphs for clinical and environmental *A. fumigatus* isolates in this study

| <i>Cyp51A</i> genotype                   | Number of clinical isolates<br>(% of clinical isolates) | Number of environmental<br>isolates (% of environmental<br>isolates) |
|------------------------------------------|---------------------------------------------------------|----------------------------------------------------------------------|
| TR <sub>34</sub> /L98H                   | 44 (28.8%)                                              | 41 (63.1%)                                                           |
| TR <sub>34</sub>                         | 0                                                       | 1 (1.5%)                                                             |
| TR <sub>34</sub> /L98H/T289A/I364V/G448S | 4 (2.6%)                                                | 0                                                                    |
| TR <sub>46</sub> /Y121F/T289A            | 0                                                       | 7 (10.8%)                                                            |
| P216L                                    | 2 (1.3%)                                                | 0                                                                    |
| G54W                                     | 9 (5.9%)                                                | 0                                                                    |
| G54E                                     | 1 (0.6%)                                                | 0                                                                    |
| G54R                                     | 2 (1.3%)                                                | 1 (1.5%)                                                             |
| Wildtype                                 | 91 (59.5%)                                              | 15 (23.1%)                                                           |
| <i>MAT1-1</i>                            | 64 (41.8%)                                              | 15 (23.1%)                                                           |
| <i>MAT1-2</i>                            | 89 (56.2%)                                              | 50 (76.9%)                                                           |

**Table S5**

Relative frequencies of metadata associated with Clades A and B within this dataset

|                                     | Clade A (total 123 isolates) | Clade B (total 95 isolates) |
|-------------------------------------|------------------------------|-----------------------------|
| Number of clinical isolates         | 71 (58%)                     | 82 (86%)                    |
| Number of environmental<br>isolates | 52 (42%)                     | 13 (14%)                    |
| <i>MAT1-1</i>                       | 48 (39%)                     | 31 (33%)                    |
| <i>MAT1-2</i>                       | 75 (61%)                     | 64 (66%)                    |
| <i>Cyp51A</i> wildtype              | 24 (20%)                     | 82 (86%)                    |
| <i>Cyp51A</i> AMR polymorphisms     | 99 (80%)                     | 13 (14%)                    |

**Table S6**



Metadata for non-UK isolates added to phylogenetic analyses to confirm assignment of isolates into two clades, A and B

| Isolate  | Source   | Location | <i>Cyp51A</i> polymorphisms | Date of isolation | Reference                              | Project accession |
|----------|----------|----------|-----------------------------|-------------------|----------------------------------------|-------------------|
| DRX13572 | Clinical | Japan    | Wildtype                    | 2009              | Takahashi-Nakaguchi <i>et al.</i> 2015 | DRA001281         |
| DRX13573 | Clinical | Japan    | Wildtype                    | 2009              | Takahashi-Nakaguchi <i>et al.</i> 2015 | DRA001281         |
| DRX13574 | Clinical | Japan    | Wildtype                    | 2007              | Takahashi-Nakaguchi <i>et al.</i> 2015 | DRA001281         |
| DRX13575 | Clinical | Japan    | Wildtype                    | 2009              | Takahashi-Nakaguchi <i>et al.</i> 2015 | DRA001281         |
| DRX13576 | Clinical | Japan    | Wildtype                    | 2011              | Takahashi-Nakaguchi <i>et al.</i> 2015 | DRA001281         |
| DRX13677 | Clinical | Japan    | Wildtype                    | 2009              | Takahashi-Nakaguchi <i>et al.</i> 2015 | DRA001281         |
| DRX13578 | Clinical | Japan    | Wildtype                    | 2012              | Takahashi-Nakaguchi <i>et al.</i> 2015 | DRA001281         |
| DRX13579 | Clinical | Japan    | Wildtype                    | 2012              | Takahashi-Nakaguchi <i>et al.</i> 2015 | DRA001281         |
| DRX15829 | Clinical | Japan    | Wildtype                    | 2009              | Takahashi-Nakaguchi <i>et al.</i> 2015 | DRA001281         |
| DRX15830 | Clinical | Japan    | Wildtype                    | 2009              | Takahashi-Nakaguchi <i>et al.</i> 2015 | DRA001281         |
| DRX15831 | Clinical | Japan    | Wildtype                    | 2009              | Takahashi-Nakaguchi <i>et al.</i> 2015 | DRA001281         |
| DRX15832 | Clinical | Japan    | Wildtype                    | 2010              | Takahashi-Nakaguchi <i>et al.</i> 2015 | DRA001281         |
| DRX15833 | Clinical | Japan    | Wildtype                    | 2010              | Takahashi-Nakaguchi <i>et al.</i> 2015 | DRA001281         |
| DRX15834 | Clinical | Japan    | Wildtype                    | 2012              | Takahashi-Nakaguchi <i>et al.</i> 2015 | DRA001281         |
| DRX15835 | Clinical | Japan    | Wildtype                    | 2012              | Takahashi-Nakaguchi <i>et al.</i> 2015 | DRA001281         |

|              |               |                 |                        |      |                                        |           |
|--------------|---------------|-----------------|------------------------|------|----------------------------------------|-----------|
| DRX15836     | Clinical      | Japan           | Wildtype               | 2013 | Takahashi-Nakaguchi <i>et al.</i> 2015 | DRA001281 |
| DRX15837     | Clinical      | Japan           | Wildtype               | 2014 | Takahashi-Nakaguchi <i>et al.</i> 2015 | DRA001281 |
| IFM59355-1   | Clinical      | Japan           | Wildtype               | 2009 | Hagiwara <i>et al.</i> 2014            | PRJDB3064 |
| IFM59355-2   | Clinical      | Japan           | Wildtype               | 2009 | Hagiwara <i>et al.</i> 2014            | PRJDB3064 |
| IFM59356-1   | Clinical      | Japan           | Wildtype               | 2009 | Hagiwara <i>et al.</i> 2014            | PRJDB3064 |
| IFM59356-2   | Clinical      | Japan           | Wildtype               | 2009 | Hagiwara <i>et al.</i> 2014            | PRJDB3064 |
| IFM59356-3   | Clinical      | Japan           | Wildtype               | 2009 | Hagiwara <i>et al.</i> 2014            | PRJDB3064 |
| IFM59361-1   | Clinical      | Japan           | Wildtype               | 2009 | Hagiwara <i>et al.</i> 2014            | PRJDB3064 |
| IFM59361-2   | Clinical      | Japan           | Wildtype               | 2009 | Hagiwara <i>et al.</i> 2014            | PRJDB3064 |
| IFM60237     | Clinical      | Japan           | P216L                  | 2011 | Hagiwara <i>et al.</i> 2014            | PRJDB3064 |
| 08-12-12-13  | Clinical      | The Netherlands | TR <sub>34</sub> /L98H | 2003 | Abdolrasouli <i>et al.</i> 2015        | PRJEB8623 |
| 08-36-03-25  | Clinical      | The Netherlands | TR <sub>34</sub> /L98H | 2005 | Abdolrasouli <i>et al.</i> 2015        | PRJEB8623 |
| 08-31-08-91  | Clinical      | The Netherlands | TR <sub>34</sub> /L98H | 2004 | Abdolrasouli <i>et al.</i> 2015        | PRJEB8623 |
| 10-01-02-27  | Clinical      | The Netherlands | TR <sub>34</sub> /L98H | 2010 | Abdolrasouli <i>et al.</i> 2015        | PRJEB8623 |
| Afu_942_09   | Clinical      | India           | TR <sub>34</sub> /L98H | 2009 | Abdolrasouli <i>et al.</i> 2015        | PRJEB8623 |
| Afu_1942_09  | Clinical      | India           | TR <sub>34</sub> /L98H | 2009 | Abdolrasouli <i>et al.</i> 2015        | PRJEB8623 |
| Afu_343_P_11 | Clinical      | India           | TR <sub>34</sub> /L98H | 2011 | Abdolrasouli <i>et al.</i> 2015        | PRJEB8623 |
| Afu_591_12   | Clinical      | India           | TR <sub>34</sub> /L98H | 2012 | Abdolrasouli <i>et al.</i> 2015        | PRJEB8623 |
| 08-19-02-61  | Environmental | The Netherlands | TR <sub>34</sub> /L98H | 2008 | Abdolrasouli <i>et al.</i> 2015        | PRJEB8623 |

|             |               |                 |                        |      |                                 |           |
|-------------|---------------|-----------------|------------------------|------|---------------------------------|-----------|
| 08-19-02-30 | Environmental | The Netherlands | Wildtype               | 2008 | Abdolrasouli <i>et al.</i> 2015 | PRJEB8623 |
| 08-19-02-46 | Environmental | The Netherlands | TR <sub>34</sub> /L98H | 2008 | Abdolrasouli <i>et al.</i> 2015 | PRJEB8623 |
| 08-19-02-10 | Environmental | The Netherlands | TR <sub>34</sub> /L98H | 2008 | Abdolrasouli <i>et al.</i> 2015 | PRJEB8623 |
| Afu_124_E11 | Environmental | India           | TR <sub>34</sub> /L98H | 2011 | Abdolrasouli <i>et al.</i> 2015 | PRJEB8623 |
| Afu_166_E11 | Environmental | India           | TR <sub>34</sub> /L98H | 2011 | Abdolrasouli <i>et al.</i> 2015 | PRJEB8623 |
| Afu_257_E11 | Environmental | India           | TR <sub>34</sub> /L98H | 2011 | Abdolrasouli <i>et al.</i> 2015 | PRJEB8623 |
| Afu_218_E11 | Environmental | India           | TR <sub>34</sub> /L98H | 2011 | Abdolrasouli <i>et al.</i> 2015 | PRJEB8623 |

**Table S7**

Average value of Tajima's *D* statistic per chromosome for isolates within Clades A and B, and average and  $F_{ST}$  values per chromosome. Range of values are shown in brackets.

| Chromosome | Clade A                  | Clade B                  | $F_{ST}$               |
|------------|--------------------------|--------------------------|------------------------|
| I          | 0.4047 (-1.9766-3.9560)  | -0.5535 (-2.6785-2.6761) | 0.1022 (0-0.9440)      |
| II         | 0.5241 (-2.4022-5.5133)  | -0.3028 (-2.0764-4.8010) | 0.1156 (0.0069-0.3539) |
| III        | 0.3267 (-2.1441-4.3288)  | -0.3422 (-2.5142-3.2920) | 0.1273 (0.0092-0.4244) |
| IV         | 0.2774 (-2.1356-3.9701)  | -0.4883 (-2.4272-3.7844) | 0.1622 (0.0115-0.5633) |
| V          | 0.3775 (-2.26076-4.3397) | -0.3317 (-2.2117-3.4575) | 0.1616 (0.0168-0.5171) |
| VI         | 0.7591 (-2.0187-4.1077)  | -0.5145 (-2.5173-3.6985) | 0.1055 (0.0131-0.4314) |
| VII        | 0.7888 (-2.0023-4.1684)  | -0.2754 (-2.6883-3.8941) | 0.1530 (0.0208-0.5591) |

|                   |                         |                            |                        |
|-------------------|-------------------------|----------------------------|------------------------|
| VIII              | 0.6067 (-2.0557-4.4425) | -0.0396 (-2.2204-3.1474)   | 0.1530 (0.0202-0.3710) |
| Mitochondria (MT) | 0.5311 (-1.0274-2.6496) | -0.7255 (-0.9931- -0.2730) | 0.1520 (0.0682-0.2765) |

**Table S8**

Genes found within regions of high  $F_{ST}$  in Chromosome 1 when performing fixation index analysis between Clades A and B in non-overlapping windows of 10 kb

| Gene ID    | Genomic Location      | Product Description                                                             |
|------------|-----------------------|---------------------------------------------------------------------------------|
| Afu1g15000 | 4,029,090 – 4,031,693 | Putative isopropylmalate synthase                                               |
| Afu1g15010 | 4,031,939 – 4,038,777 | Ortholog of <i>A. flavus</i> putative AMP binding domain protein AFLA_084630    |
| Afu1g15020 | 4,039,173 – 4,040,722 | 40S ribosomal protein S5                                                        |
| Afu1g16860 | 4,598,911 – 4,600,377 | Ortholog of <i>A. flavus</i> conserved hypothetical protein ALFA_082490         |
| Afu1g16870 | 4,600,954 – 4,602,774 | Ortholog of <i>A. flavus</i> conserved hypothetical protein AFLA_016260         |
| Afu1g16880 | 4,603,153 – 4,608,184 | Ortholog of <i>A. flavus</i> putative ABC multidrug transporter AFLA_082400     |
| Afu1g16890 | 4,608,535 – 4,609,830 | Ortholog of <i>A. flavus</i> putative transesterase LovD AFLA_063440            |
| Afu1g16900 | 4,615,099 – 4,617,349 | Ortholog of <i>A. fumigatus</i> A1163 AFUB_016290 (protein of unknown function) |
| Afu1g16910 | 4,617,552 – 4,619,374 | Has domain with predicted role in transmembrane transport                       |

**Table S9**

Pairs or groups of *A. fumigatus* isolates from both environmental and clinical sources with high genetic relatedness.

| Pair/ Group | Isolates included (Clade) | Mating idiomorph | Source                    | <i>cyp51A</i> allele                             | Bootstrap support | Average SNPs separating isolates | One tailed t-test $p$ -value |
|-------------|---------------------------|------------------|---------------------------|--------------------------------------------------|-------------------|----------------------------------|------------------------------|
| 1           | C21 (A <sub>A</sub> )     | MAT1-2<br>MAT1-2 | Environmental<br>Clinical | TR <sub>34</sub> /L98H<br>TR <sub>34</sub> /L98H | 100%              | 227                              | <3.0473 <sup>e-252</sup>     |

|   |                                                     |                                                |                                                               |                                                                            |      |     |                          |
|---|-----------------------------------------------------|------------------------------------------------|---------------------------------------------------------------|----------------------------------------------------------------------------|------|-----|--------------------------|
|   | C112 (A <sub>A</sub> )                              |                                                |                                                               |                                                                            |      |     |                          |
| 2 | C133 (A <sub>A</sub> )<br>C23 (A <sub>A</sub> )     | MAT1-2<br>MAT1-2                               | Clinical<br>Environmental                                     | TR <sub>34</sub> /L98H<br>TR <sub>34</sub> /L98H                           | 65%  | 270 | <3.0473 <sup>e-252</sup> |
| 3 | C354 (A)<br>C355 (A)<br>C357 (A)                    | MAT1-2<br>MAT1-1<br>MAT1-1                     | Clinical<br>Clinical<br>Environmental                         | TR <sub>34</sub> /L98H<br>TR <sub>34</sub> /L98H<br>TR <sub>34</sub> /L98H | 100% | 237 | <3.0473 <sup>e-252</sup> |
| 4 | C191 (B)<br>C275 (B)                                | MAT1-2<br>MAT1-2                               | Clinical<br>Environmental                                     | Wildtype<br>Wildtype                                                       | 100% | 581 | <3.0473 <sup>e-252</sup> |
| 5 | C96 (B)<br>C42 (B)<br>C43 (B)<br>C44 (B)<br>C48 (B) | MAT1-2<br>MAT1-2<br>MAT1-2<br>MAT1-2<br>MAT1-2 | Environmental<br>Clinical<br>Clinical<br>Clinical<br>Clinical | Wildtype<br>Wildtype<br>Wildtype<br>Wildtype<br>Wildtype                   | 79%  | 217 | 3.0473 <sup>e-252</sup>  |
| 6 | C7 (A)<br>C25 (A)<br>C82 (A)                        | MAT1-2<br>MAT1-2<br>MAT1-2                     | Environmental<br>Environmental<br>Clinical                    | TR <sub>34</sub> /L98H<br>TR <sub>34</sub> /L98H<br>TR <sub>34</sub> /L98H | 100% | 252 | 1.7857 <sup>e-112</sup>  |

**Table S10**

Essential Af293 genes are found within the pangenome but vary amongst the population

| Pangenome gene ID | Af293 gene ID | Number of genomes |
|-------------------|---------------|-------------------|
| centroid_9134     | AFUA_2G09060  | 156               |
| centroid_9784     | AFUA_4G11280  | 173               |
| centroid_4480     | AFUA_3G12290  | 215               |
| centroid_6938     | AFUA_6G04740  | 215               |
| centroid_2065     | AFUA_2G07570  | 216               |
| centroid_4310     | AFUA_2G06150  | 216               |
| centroid_8665     | AFUA_6G06810  | 217               |
| centroid_904      | AFUA_1G13100  | 217               |
| centroid_1959     | AFUA_2G12370  | 217               |
| centroid_7884     | AFUA_3G08080  | 217               |
| centroid_3136     | AFUA_1G14740  | 217               |
| centroid_8331     | AFUA_2G03310  | 217               |

Supplementary Figure legends

**Extended Data Figure 1:** Microreact project screenshot of the dataset

<https://microreact.org/project/viUDBzrCmTNKmY9Fu6Zhxi>

**Extended Data Figure 2:** Phylogenetic analysis of all 218 *A. fumigatus* isolates with bootstrap support over 1000 replicates performed on WGS SNP data to generate maximum-likelihood phylogeny. Branch lengths represent average number of SNPs.

**Extended Data Figure 3:** Phylogenetic analysis of all 218 *A. fumigatus* isolates plus an additional 41 publicly available WGS of non-UK origin confirms the clade assignment into Clades A and B was not an artifact of these data but also seen globally. These additional data comprised of 33 clinical and 8 environmental isolates. Maximum-likelihood phylogeny generated with bootstrap support over 1000 replicates on WGS SNP data.

**Extended Data Figure 4:** Microreact project screenshot of the dataset with DAPC clusters showing lack of geographic and temporal clustering.

**Extended Data Figure 5:** Scatterplots of sliding 10-kb non-overlapping window estimates of  $F_{ST}$  for each chromosome between isolates within Clusters 1 and 2, Clusters 1 and 3, and Clusters 2 and 3 (top to bottom, left panel). Scatterplots of Tajima's D estimates for each chromosome for all isolates within Clusters 1, 2 and 3 (right panel). The position of *cyp51A* is highlighted in red.

#### Supplementary Data

**Supplementary Data 1 (Excel format):** Significant SNPs for itraconazole resistance using the TreeWAS subsequent association test, in order of ascending p-value for all *A. fumigatus* isolates in this study with known itraconazole MICs. Chromosome, SNP position and gene loci listed along with gene description and type of SNP (synonymous or non-synonymous).

**Supplementary Data 2 (Excel format):** Significant SNPs for itraconazole resistance using the TreeWAS terminal association test, in order of ascending p-value for all *A. fumigatus* isolates in this study with known itraconazole MICs. Chromosome, SNP position and gene loci listed along with gene description and type of SNP (synonymous or non-synonymous).

**Supplementary Data 3 (Excel format):** Significant SNPs for itraconazole resistance using the TreeWAS simultaneous association test, in order of ascending p-value for all *A. fumigatus* isolates in this study with known itraconazole MICs. Chromosome, SNP position and gene loci listed along with gene description and type of SNP (synonymous or non-synonymous).

**Supplementary Data 4 (Excel format):** Summary of 184 genes found in region of high  $F_{ST}$  in chromosome 1 when comparing clades A and B. Associated p-values from TreeWAS for genes containing SNPs that are statistically significant for itraconazole resistance are also included.

**Supplementary Data 5, 6 and 7 (Excel format):** filtered Scoary results of all genes associated with Clade A vs. B (5), azole drug resistance (6) and mutation vs. wildtype (7) from pangenome analysis.
